# Supplementary material for: Modelling the Phosphorylation of Glucose by Human hexokinase I
Source: MDPI journal article supplement (doi:10.3390/math9182315), 2021-09-18
Supplement: s1 [file s1]

# Supplementary material

## 1. The chemical reactions

Here we list all of the enzymatic reactions included in the mathematical model. For brevity, we introduce the following notation.

$E$ : free *hexokinase I* enzyme,  $G$ : glucose,  $T$ : *ATP*,  
 $G6$ : *G6P*,  $P$ :  $P_i$ ,  $D$ : *ADP*,

$k_0$ : catalytic constant rate,

$k^G, k^T, k^{G6}, k^P$ : adsorption constant rates of glucose, *ATP*, *G6P*, and  $P_i$  on the  $N$ -binding sites, respectively.

$k^{-G}, k^{-T}, k^{-G6}, k^{-P}$ : desorption constant rates of glucose, *ATP*, *G6P*, and  $P_i$  from the  $N$ -binding sites, respectively.

$k_G, k_T, k_{G6}, k_P$ : adsorption constant rates of glucose, *ATP*, *G6P*, and  $P_i$  on the  $C$ -binding sites, respectively.

$k_{-G}, k_{-T}, k_{-G6}, k_{-P}$ : desorption constant rates of glucose, *ATP*, *G6P*, and  $P_i$  from the  $C$ -binding sites, respectively.

$k_{G6}^P, k_{-G6}^P$ : adsorption and desorption constant rates of *G6P* on and from the  $C$ -binding site of complexes of enzyme with one  $P_i$  molecule bound at the  $N$ -binding site.

${}_yE_z^x$ : an enzyme complex with an  $x$  molecule bound at its  $N$ -binding site, a  $y$  molecule bound at its  $C$ -site, and a  $z$  molecule bound at its  $C$ -site.

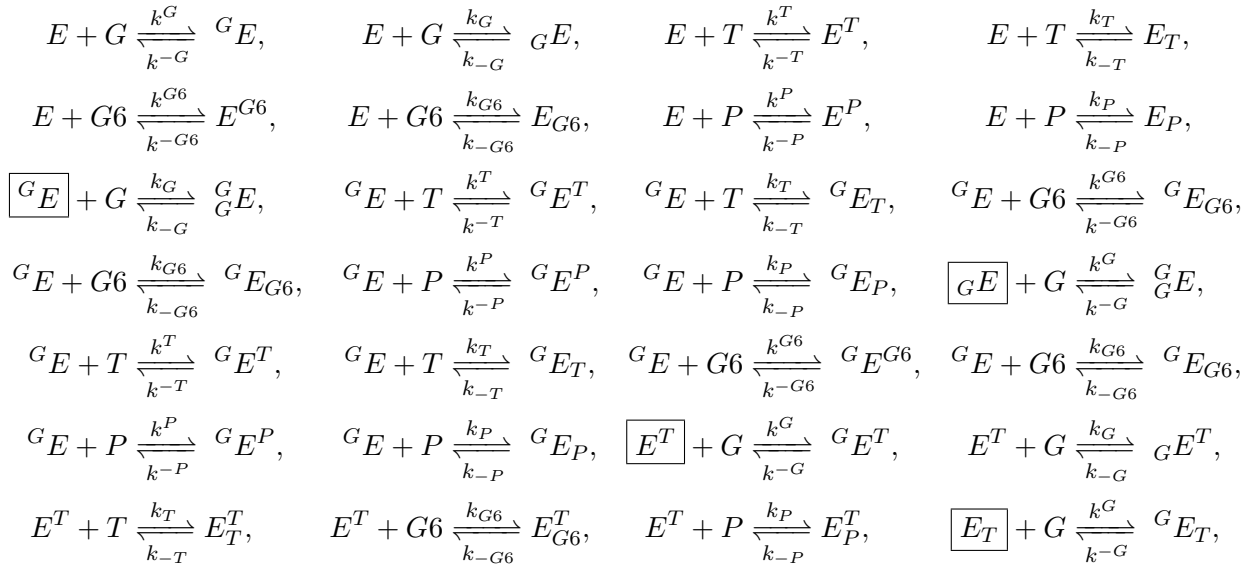

$$\begin{array}{llll}
E_T + G \xrightleftharpoons[k_{-G}]{k_G} {}^G E_T, & E_T + T \xrightleftharpoons[k_{-T}]{k^T} E_T^T, & E_T + G6 \xrightleftharpoons[k_{-G6}]{k^{G6}} E_T^{G6}, & E_T + P \xrightleftharpoons[k_{-P}]{k^P} E_T^P, \\
\boxed{E^{G6}} + G \xrightleftharpoons[k_{-G}]{k^G} {}^G E^{G6}, & E^{G6} + G \xrightleftharpoons[k_{-G}]{k_G} {}^G E^{G6}, & \boxed{E_{G6}} + G \xrightleftharpoons[k_{-G}]{k^G} {}^G E_{G6}, & E_{G6} + G \xrightleftharpoons[k_{-G}]{k_G} {}^G E_{G6}, \\
E_{G6} + T \xrightleftharpoons[k_{-T}]{k^T} E_{G6}^T, & E_{G6} + P \xrightleftharpoons[k_{-P}]{k^P} E_{G6}^P, & \boxed{E^P} + G \xrightleftharpoons[k_{-G}]{k^G} {}^G E^P, & E^P + G \xrightleftharpoons[k_{-G}]{k_G} {}^G E^P, \\
E^P + T \xrightleftharpoons[k_{-T}]{k^T} E_T^P, & E^P + G6 \xrightleftharpoons[k_{-G6}^P]{k^{G6}} E_{G6}^P, & E^P + P \xrightleftharpoons[k_{-P}]{k_P} E_P^P, & \boxed{E_P} + G \xrightleftharpoons[k_{-G}]{k^G} {}^G E_P, \\
E_P + G \xrightleftharpoons[k_{-G}]{k_G} {}^G E_P, & E_P + T \xrightleftharpoons[k_{-T}]{k^T} E_P^T, & E_P + G6 \xrightleftharpoons[k_{-G6}]{k^{G6}} E_P^{G6}, & E_P + P \xrightleftharpoons[k_{-P}]{k^P} E_P^P, \\
\boxed{{}^G E^T} + G \xrightleftharpoons[k_{-G}]{k_G} {}^G E^T, & {}^G E^T + T \xrightleftharpoons[k_{-T}]{k^T} {}^G E_T^T, & {}^G E^T + G6 \xrightleftharpoons[k_{-G6}]{k^{G6}} {}^G E_{G6}^T, & {}^G E^T + P \xrightleftharpoons[k_{-P}]{k_P} {}^G E_P^T, \\
\boxed{{}^G E^{G6}} + G \xrightleftharpoons[k_{-G}]{k_G} {}^G E^{G6}, & \boxed{{}^G E^P} + G \xrightleftharpoons[k_{-G}]{k^G} {}^G E^P, & {}^G E^P + T \xrightleftharpoons[k_{-T}]{k^T} {}^G E_T^P, & {}^G E^P + G6 \xrightleftharpoons[k_{-G6}^P]{k^{G6}} {}^G E_{G6}^P, \\
{}^G E^P + P \xrightleftharpoons[k_{-P}]{k_P} {}^G E_P^P, & \boxed{{}^G E} + T \xrightleftharpoons[k_{-T}]{k^T} {}^G E^T, & {}^G E + T \xrightleftharpoons[k_{-T}]{k^T} {}^G E_T, & {}^G E + G6 \xrightleftharpoons[k_{-G6}]{k^{G6}} {}^G E^{G6}, \\
{}^G E + G6 \xrightleftharpoons[k_{-G6}]{k^{G6}} {}^G E_{G6}, & {}^G E + P \xrightleftharpoons[k_{-P}]{k^P} {}^G E^P, & {}^G E + P \xrightleftharpoons[k_{-P}]{k_P} {}^G E_P, & \boxed{{}^G E_T} + G \xrightleftharpoons[k_{-G}]{k^G} {}^G E_T, \\
{}^G E_T + T \xrightleftharpoons[k_{-T}]{k^T} {}^G E_T^T, & {}^G E_T + G6 \xrightleftharpoons[k_{-G6}]{k^{G6}} {}^G E_T^{G6}, & {}^G E_T + P \xrightleftharpoons[k_{-P}]{k^P} {}^G E_T^P, & \boxed{{}^G E_{G6}} + G \xrightleftharpoons[k_{-G}]{k^G} {}^G E_{G6}, \\
{}^G E_{G6} + T \xrightleftharpoons[k_{-T}]{k^T} {}^G E_{G6}^T, & {}^G E_{G6} + P \xrightleftharpoons[k_{-P}]{k^P} {}^G E_{G6}^P, & \boxed{{}^G E_P} + G \xrightleftharpoons[k_{-G}]{k^G} {}^G E_P, & {}^G E_P + T \xrightleftharpoons[k_{-T}]{k^T} {}^G E_P^T, \\
{}^G E_P + G6 \xrightleftharpoons[k_{-G6}]{k^{G6}} {}^G E_P^{G6}, & {}^G E_P + P \xrightleftharpoons[k_{-P}]{k^P} {}^G E_P^P, & \boxed{{}^G E^T} + G \xrightleftharpoons[k_{-G}]{k^G} {}^G E^T, & {}^G E^T + T \xrightleftharpoons[k_{-T}]{k^T} {}^G E_T^T, \\
{}^G E^T + G6 \xrightleftharpoons[k_{-G6}]{k^{G6}} {}^G E_{G6}^T, & {}^G E^T + P \xrightleftharpoons[k_{-P}]{k^P} {}^G E_P^T, & \boxed{E_T^T} + G \xrightleftharpoons[k_{-G}]{k^G} {}^G E_T^T, & E_T^T + G \xrightleftharpoons[k_{-G}]{k_G} {}^G E_T^T, \\
\boxed{E_{G6}^T} + G \xrightleftharpoons[k_{-G}]{k^G} {}^G E_{G6}^T, & E_{G6}^T + G \xrightleftharpoons[k_{-G}]{k_G} {}^G E_{G6}^T, & \boxed{E_P^T} + G \xrightleftharpoons[k_{-G}]{k^G} {}^G E_P^T, & E_P^T + G \xrightleftharpoons[k_{-G}]{k_G} {}^G E_P^T, \\
\boxed{{}^G E^{G6}} + G \xrightleftharpoons[k_{-G}]{k^G} {}^G E^{G6}, & \boxed{E_T^{G6}} + G \xrightleftharpoons[k_{-G}]{k^G} {}^G E_T^{G6}, & E_T^{G6} + G \xrightleftharpoons[k_{-G}]{k_G} {}^G E_T^{G6}, & \boxed{E_P^{G6}} + G \xrightleftharpoons[k_{-G}]{k^G} {}^G E_P^{G6}, \\
E_P^{G6} + G \xrightleftharpoons[k_{-G}]{k_G} {}^G E_P^{G6}, & \boxed{{}^G E^P} + G \xrightleftharpoons[k_{-G}]{k^G} {}^G E^P, & {}^G E^P + T \xrightleftharpoons[k_{-T}]{k^T} {}^G E_T^P, & {}^G E^P + G6 \xrightleftharpoons[k_{-G6}^P]{k^{G6}} {}^G E_{G6}^P, \\
{}^G E^P + P \xrightleftharpoons[k_{-P}]{k_P} {}^G E_P^P, & \boxed{E_T^P} + G \xrightleftharpoons[k_{-G}]{k^G} {}^G E_T^P, & E_T^P + G \xrightleftharpoons[k_{-G}]{k_G} {}^G E_T^P, & \boxed{E_{G6}^P} + G \xrightleftharpoons[k_{-G}]{k^G} {}^G E_{G6}^P, \\
E_{G6}^P + G \xrightleftharpoons[k_{-G}]{k_G} {}^G E_{G6}^P, & \boxed{E_P^P} + G \xrightleftharpoons[k_{-G}]{k^G} {}^G E_P^P, & E_P^P + G \xrightleftharpoons[k_{-G}]{k_G} {}^G E_P^P, & \boxed{{}^G E_T} + G \xrightleftharpoons[k_{-G}]{k^G} {}^G E_T, \\
{}^G E_T + T \xrightleftharpoons[k_{-T}]{k^T} {}^G E_T^T, & {}^G E_T + G6 \xrightleftharpoons[k_{-G6}]{k^{G6}} {}^G E_T^{G6}, & {}^G E_T + P \xrightleftharpoons[k_{-P}]{k^P} {}^G E_T^P, & \boxed{{}^G E_{G6}} + G \xrightleftharpoons[k_{-G}]{k^G} {}^G E_{G6}, \\
{}^G E_{G6} + T \xrightleftharpoons[k_{-T}]{k^T} {}^G E_{G6}^T, & {}^G E_{G6} + P \xrightleftharpoons[k_{-P}]{k^P} {}^G E_{G6}^P, & \boxed{{}^G E_P} + G \xrightleftharpoons[k_{-G}]{k^G} {}^G E_P, & {}^G E_P + T \xrightleftharpoons[k_{-T}]{k^T} {}^G E_P^T,
\end{array}$$

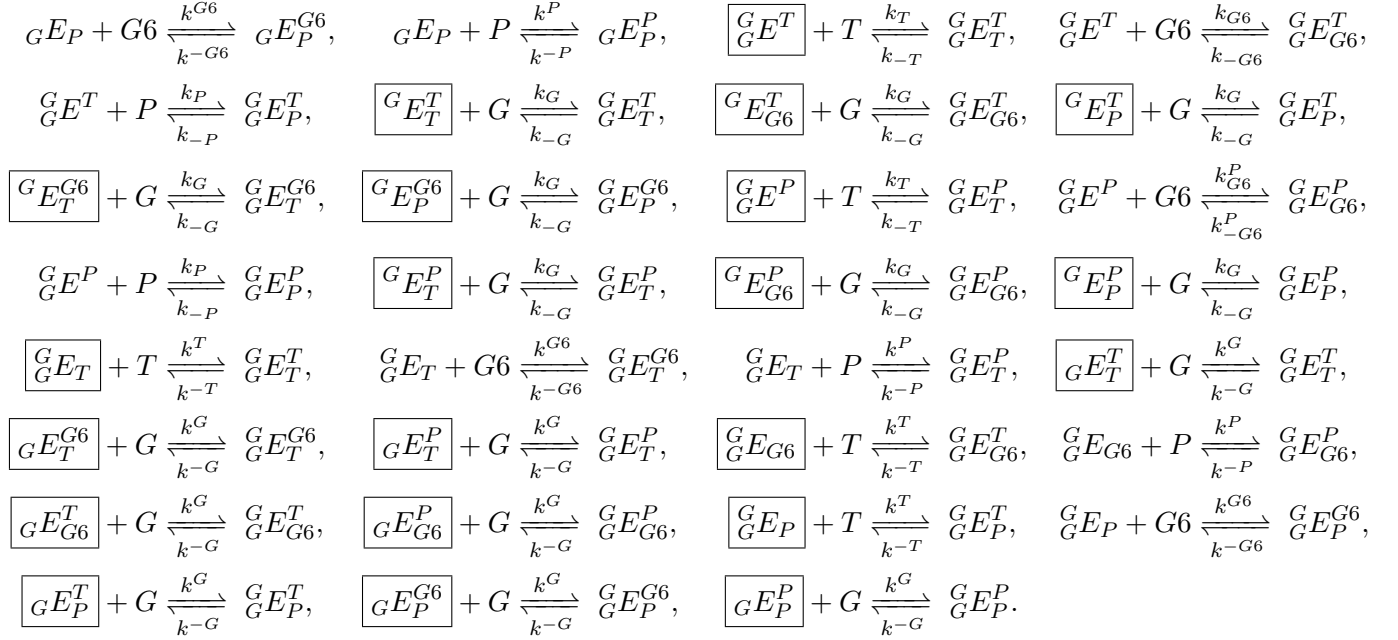

Note no substrate can bind to the  $\boxed{{}_G E^{G6}}$  complex. Here are all reactions that produce product

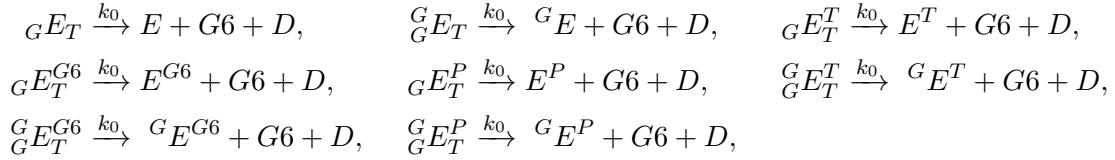

## 2. The model equations

We now list the complete set of governing equations for the model. The notation used is explained in the paper. Information on how these equations are constructed can also be found in the paper.

$$\begin{aligned}
\frac{d[E]}{dt} &= k_0[{}_G E_T] + k^{-G}[{}_G E] + k_{-G}[{}_G E] + k^{-T}[E^T] + k_{-T}[{}_G E_T] + k^{-G6}[E^{G6}] \\
&\quad + k_{-G6}[E_{G6}] + k^{-P}[E^P] + k_{-P}[{}_G E_P] - [E]((k^G + k_G)[G] \\
&\quad + (k^T + k_T)[T] + (k^{G6} + k_{G6})[G6] + (k^P + k_P)[P]),
\end{aligned} \tag{1}$$

$$\begin{aligned}
\frac{d[G]}{dt} = & k^{-G}([^GE] + [^GE^T] + [^GE^{G6}] + [^GE^P] + [^GE_T] + [^GE_{G6}] + [^GE_P] + [^GE_T^T] \\
& + [^GE_{G6}^T] + [^GE_P^T] + [^GE_T^{G6}] + [^GE_P^{G6}] + [^GE_T^P] + [^GE_{G6}^P] + [^GE_P^P]) \\
& + k_{-G}([_GE] + [_GE_T] + [_GE_{G6}] + [_GE_P] + [_GE^T] + [_GE^{G6}] + [_GE^P] + [_GE_T^T] \\
& + [_GE_T^{G6}] + [_GE_T^P] + [_GE_{G6}^T] + [_GE_{G6}^P] + [_GE_P^T] + [_GE_P^{G6}] + [_GE_P^P]) \\
& + (k^{-G} + k_{-G})([_G^GE] + [_G^GE^T] + [_G^GE^{G6}] + [_G^GE^P] + [_G^GE_T] + [_G^GE_{G6}] + [_G^GE_P] \\
& + [_G^GE_T^T] + [_G^GE_{G6}^T] + [_G^GE_P^T] + [_G^GE_T^{G6}] + [_G^GE_P^{G6}] + [_G^GE_T^P] + [_G^GE_{G6}^P] + [_G^GE_P^P]) \\
& - [G]((k^G + k_G)([E] + [E^T] + [E_T] + [E^{G6}] + [E_{G6}] + [E^P] + [E_P] \\
& + [E_T^T] + [E_{G6}^T] + [E_P^T] + [E_T^{G6}] + [E_P^{G6}] + [E_T^P] + [E_{G6}^P] + [E_P^P]) \\
& + k^G([_GE] + [_GE^T] + [_GE^{G6}] + [_GE^P] + [_GE_T] + [_GE_{G6}] + [_GE_P] + [_GE_T^T] \\
& + [_GE_T^{G6}] + [_GE_T^P] + [_GE_{G6}^T] + [_GE_{G6}^P] + [_GE_P^T] + [_GE_P^{G6}] + [_GE_P^P]) \\
& + k_G([^GE] + [^GE^T] + [^GE^{G6}] + [^GE^P] + [^GE_T] + [^GE_{G6}] + [^GE_P] + [^GE_T^T] \\
& + [^GE_{G6}^T] + [^GE_P^T] + [^GE_T^{G6}] + [^GE_P^{G6}] + [^GE_T^P] + [^GE_{G6}^P] + [^GE_P^P])), \tag{2}
\end{aligned}$$

$$\begin{aligned}
\frac{d[T]}{dt} = & k^{-T}([E^T] + [_GE^T] + [E_{G6}^T] + [E_P^T] + [_G^GE^T] + [_G^GE_{G6}^T] + [_G^GE_P^T] + [_GE_T^{G6}] + [_GE_P^{G6}] \\
& + [_G^GE_T^T] + [_G^GE_P^T]) + k_{-T}([E_T] + [_GE_T] + [E_T^{G6}] + [E_T^P] + [_G^GE_T] + [_GE_T^{G6}] + [_GE_T^P] \\
& + [_G^GE_T^{G6}] + [_G^GE_T^P] + [_G^GE_T^{G6}] + [_G^GE_T^P]) + (k^{-T} + k_{-T})([E_T^T] + [_G^GE_T^T] + [_GE_T^T] + [_G^GE_T^T]) \\
& - [T]((k^T + K_T)([E] + [_GE] + [_GE] + [_G^GE]) + k^T([E_T] + [E_{G6}] + [E_P] + [_GE_T] \\
& + [_G^GE_{G6}] + [_GE_P] + [_GE_T] + [_GE_{G6}] + [_GE_P] + [_G^GE_T] + [_G^GE_{G6}] + [_G^GE_P]) \\
& + k_T([E^T] + [E^P] + [_GE^T] + [_GE^P] + [_GE^T] + [_GE^P] + [_G^GE^T] + [_G^GE^P])), \tag{3}
\end{aligned}$$

$$\begin{aligned}
\frac{d[G6]}{dt} = & k_0([_GE_T] + [_G^GE_T] + [_GE_T^T] + [_GE_T^{G6}] + [_GE_T^P] + [_G^GE_T^T] + [_G^GE_T^{G6}] + [_G^GE_T^P]) \\
& + k^{-G6}([E^{G6}] + [^GE^{G6}] + [_GE^{G6}] + [E_T^{G6}] + [E_P^{G6}] + [_G^GE^{G6}] + [_GE_T^{G6}] + [^GE_P^{G6}] \\
& + [_GE_T^{G6}] + [_GE_P^{G6}] + [_G^GE_T^{G6}] + [_G^GE_P^{G6}]) + k_{-G6}([E_{G6}] + [_GE_{G6}] + [^GE_{G6}] + [E_{G6}^T] \\
& + [_G^GE_{G6}] + [_GE_T^T] + [^GE_T^T] + [_G^GE_T^T]) + k_{-G6}^P([E_{G6}^P] + [_G^GE_{G6}^P] + [_GE_{G6}^P] + [_G^GE_{G6}^P]) \\
& - [G6]((k^{G6} + k_{G6})([E] + [^GE] + [_GE] + [_G^GE]) + k^{G6}([E_T] + [^GE_T] + [E_P] \\
& + [^GE_P] + [_GE_T] + [_GE_P] + [_G^GE_T] + [_G^GE_P]) + k_{G6}([E^T] + [_GE^T] + [^GE^T] + [_G^GE^T]) \\
& + k_{G6}^P([E^P] + [_GE^P] + [^GE^P] + [_G^GE^P])), \tag{4}
\end{aligned}$$

$$\begin{aligned}
\frac{d[P]}{dt} = & k^{-P}([E^P] + [^GE^P] + [_GE^P] + [E_T^P] + [E_{G6}^P] + [_G^GE^P] + [^GE_T^P] + [^GE_{G6}^P] + [_GE_T^P] \\
& + [_GE_{G6}^P] + [_G^GE_T^P] + [_G^GE_{G6}^P]) + k_{-P}([E_P] + [_GE_P] + [^GE_P] + [E_P^T] + [E_P^{G6}] \\
& + [_G^GE_P] + [_GE_T^T] + [_GE_P^{G6}] + [_GE_T^T] + [^GE_P^{G6}] + [_G^GE_T^T] + [_G^GE_P^{G6}]) \\
& + (k^{-P} + k_{-P})([E_P^P] + [^GE_P^P] + [_GE_P^P] + [_G^GE_P^P]) \\
& - [P](k^P([E_T] + [E_{G6}] + [E_P] + [^GE_T] + [^GE_{G6}] + [^GE_P] + [_GE_T] + [_GE_{G6}] + [_GE_P] \\
& + [_G^GE_T] + [_G^GE_{G6}] + [_G^GE_P]) + k_P([E^T] + [E^P] + [_GE^T] + [_GE^P] + [^GE^T] \\
& + [^GE_P] + [_G^GE^T] + [_G^GE_P]) + (k^P + k_P)([E] + [^GE] + [_GE] + [_G^GE])), \tag{5}
\end{aligned}$$

$$\frac{d[D]}{dt} = k_0([_GE_T] + [_G^GE_T] + [_GE_T^T] + [_GE_T^{G6}] + [_GE_T^P] + [_G^GE_T^T] + [_G^GE_T^{G6}] + [_G^GE_T^P]), \tag{6}$$

$$\begin{aligned}\frac{d[{}^G E]}{dt} = & k_0[{}_G^G E_T] + k^G[G][E] + k_{-G}[{}_G^G E] + k^{-T}[{}^G E^T] + k_{-T}[{}^G E_T] + k^{-G6}[{}^G E^{G6}] \\ & + k_{-G6}[{}^G E_{G6}] + k^{-P}[{}^G E^P] + k_{-P}[{}^G E_P] - [{}^G E](k^{-G} + k_G[G]) \\ & + (k^T + k_T)[T] + (k^{G6} + k_{G6})[G6] + (k^P + k_P)[P]),\end{aligned}\quad (7)$$

$$\begin{aligned}\frac{d[E^T]}{dt} = & k_0[{}_G E_T^T] + k^{-G}[{}^G E^T] + k_{-G}[{}_G E^T] + k_{-T}[E_T^T] + k_{-G6}[E_{G6}^T] + k_{-P}[E_P^T] + k^T[T][E] \\ & - [E^T](k^{-T} + (k^G + k_G)[G] + k_T[T] + k_{G6}[G6] + k_P[P]),\end{aligned}\quad (8)$$

$$\begin{aligned}\frac{d[E^{G6}]}{dt} = & k_0[{}_G E_T^{G6}] + k^{-G}[{}^G E^{G6}] + k_{-G}[{}_G E^{G6}] + k_{-T}[E_T^{G6}] + k_{-P}[E_P^{G6}] + k^{G6}[G6][E] \\ & - [E^{G6}](k^{-G6} + (k^G + k_G)[G]),\end{aligned}\quad (9)$$

$$\begin{aligned}\frac{d[E^P]}{dt} = & k_0[{}_G E_T^P] + k^{-G}[{}^G E^P] + k_{-G}[{}_G E^P] + k_{-T}[E_T^P] + k_{-G6}^P[E_{G6}^P] + k_{-P}[E_P^P] + k^P[P][E] \\ & - [E^P](k^{-P} + (k^G + k_G)[G] + k_T[T] + k_{G6}^P[G6] + k_P[P]),\end{aligned}\quad (10)$$

$$\begin{aligned}\frac{d[{}_G E]}{dt} = & k_G[E][G] + k^{-G}[{}_G^G E] + k^{-T}[{}_G E^T] + k_{-T}[{}_G E_T] \\ & + k^{-G6}[{}_G E^{G6}] + k_{-G6}[{}_G E_{G6}] + k^{-P}[{}_G E^P] + k_{-P}[{}_G E_P] \\ & - [{}_G E](k_{-G} + k^G[G] + (k^T + k_T)[T] + (k^{G6} + k_{G6})[G6] + (k^P + k_P)[P]),\end{aligned}\quad (11)$$

$$\begin{aligned}\frac{d[E_T]}{dt} = & k^{-G}[{}^G E_T] + k_{-G}[{}_G E_T] + k^{-T}[E_T^T] + k^{-G6}[E_T^{G6}] + k^{-P}[E_T^P] + k_T[T][E] \\ & - [E_T](k_{-T} + (k^G + k_G)[G] + k^T[T] + k^{G6}[G6] + k^P[P]),\end{aligned}\quad (12)$$

$$\begin{aligned}\frac{d[E_{G6}]}{dt} = & k^{-G}[{}^G E_{G6}] + k_{-G}[{}_G E_{G6}] + k^{-T}[E_{G6}^T] + k^{-P}[E_{G6}^P] + k_{G6}[G6][E] \\ & - [E_{G6}](k_{-G6} + (k^G + k_G)[G] + k^T[T] + k^P[P]),\end{aligned}\quad (13)$$

$$\begin{aligned}\frac{d[E_P]}{dt} = & k^{-G}[{}^G E_P] + k_{-G}[{}_G E_P] + k^{-T}[E_P^T] + k^{-G6}[E_P^{G6}] + k^{-P}[E_P^P] + k_P[P][E] \\ & - [E_P](k_{-P} + (k^G + k_G)[G] + k^T[T] + k^{G6}[G6] + k^P[P]),\end{aligned}\quad (14)$$

$$\begin{aligned}\frac{d[{}^G E^T]}{dt} = & k_0[{}_G^G E_T^T] + k_{-G}[{}_G^G E^T] + k_{-T}[{}^G E_T^T] + k_{-G6}[{}^G E_{G6}^T] + k_{-P}[{}^G E_P^T] + k^G[G][E^T] \\ & + k^T[T][{}^G E] - [{}^G E^T](k^{-G} + k^{-T} + k_G[G] + k_T[T] + k_{G6}[G6] + k_P[P]),\end{aligned}\quad (15)$$

$$\begin{aligned}\frac{d[{}^G E^{G6}]}{dt} = & k_0[{}_G^G E_T^{G6}] + k_{-G}[{}_G^G E^{G6}] + k_{-T}[{}^G E_T^{G6}] + k_{-P}[{}^G E_P^{G6}] + k^G[G][E^{G6}] + k^{G6}[G6][{}^G E] \\ & - [{}^G E^{G6}](k^{-G} + k^{-G6} + k_G[G]),\end{aligned}\quad (16)$$

$$\begin{aligned}\frac{d[{}^G E^P]}{dt} = & k_0[{}_G^G E_T^P] + k_{-G}[{}_G^G E^P] + k_{-T}[{}^G E_T^P] + k_{-G6}^P[{}^G E_{G6}^P] + k_{-P}[{}^G E_P^P] + k^G[G][E^P] \\ & + k^P[P][{}^G E] - [{}^G E^P](k^{-G} + k^{-P} + k_G[G] + k_T[T] + k_{G6}^P[G6] + k_P[P]),\end{aligned}\quad (17)$$

$$\begin{aligned}\frac{d[{}_G^G E]}{dt} = & k^{-T}[{}_G^G E^T] + k_{-T}[{}_G^G E_T] + k^{-G6}[{}_G^G E^{G6}] + k_{-G6}[{}_G^G E_{G6}] + k^{-P}[{}_G^G E^P] + k_{-P}[{}_G^G E_P] \\ & + (k^G[{}_G E] + k_G[{}^G E])[G] - [{}_G^G E](k^{-G} + k_{-G} + (k^T + k_T)[T] \\ & + (k^{G6} + k_{G6})[G6] + (k^P + k_P)[P]),\end{aligned}\quad (18)$$

$$\begin{aligned}\frac{d[{}^G E_T]}{dt} &= k_{-G}[{}^G E_T] + k^{-T}[{}^G E_T^T] + k^{-G6}[{}^G E_T^{G6}] + k^{-P}[{}^G E_T^P] + k^G[G][E_T] + k_T[T][{}^G E] \\ &\quad - [{}^G E_T](k^{-G} + k_{-T} + k_G[G] + k^T[T] + k^{G6}[G6] + k^P[P]),\end{aligned}\quad (19)$$

$$\begin{aligned}\frac{d[{}^G E_{G6}]}{dt} &= k_{-G}[{}^G E_{G6}] + k^{-T}[{}^G E_{G6}^T] + k^{-P}[{}^G E_{G6}^P] + k^G[G][E_{G6}] + k_{G6}[G6][{}^G E] \\ &\quad - [{}^G E_{G6}](k^{-G} + k_{-G6} + k_G[G] + k^T[T] + k^P[P]),\end{aligned}\quad (20)$$

$$\begin{aligned}\frac{d[{}^G E_P]}{dt} &= k_{-G}[{}^G E_P] + k^{-T}[{}^G E_P^T] + k^{-G6}[{}^G E_P^{G6}] + k^{-P}[{}^G E_P^P] + k^G[G][E_P] + k_P[P][{}^G E] \\ &\quad - [{}^G E_P](k^{-G} + k_{-P} + k_G[G] + k^T[T] + k^{G6}[G6] + k^P[P]),\end{aligned}\quad (21)$$

$$\begin{aligned}\frac{d[{}_G E^T]}{dt} &= k^{-G}[{}_G E^T] + k_{-T}[{}_G E_T^T] + k_{-G6}[{}_G E_{G6}^T] + k_{-P}[{}_G E_P^T] + k_G[G][E^T] + k^T[T][{}_G E] \\ &\quad - [{}_G E^T](k_{-G} + k^{-T} + k^G[G] + k_T[T] + k_{G6}[G6] + k_P[P]),\end{aligned}\quad (22)$$

$$\begin{aligned}\frac{d[E_T^T]}{dt} &= k^{-G}[{}^G E_T^T] + k_{-G}[{}_G E_T^T] + [T](k^T[E_T] + k_T[E^T]) \\ &\quad - [E_T^T](k^{-T} + k_{-T} + (k^G + k_G)[G]),\end{aligned}\quad (23)$$

$$\begin{aligned}\frac{d[E_{G6}^T]}{dt} &= k^{-G}[{}^G E_{G6}^T] + k_{-G}[{}_G E_{G6}^T] + k^T[T][E_{G6}] + k_{G6}[G6][E^T] \\ &\quad - [E_{G6}^T](k^{-T} + k_{-G6} + (k^G + k_G)[G]),\end{aligned}\quad (24)$$

$$\begin{aligned}\frac{d[E_P^T]}{dt} &= k^{-G}[{}^G E_P^T] + k_{-G}[{}_G E_P^T] + k^T[T][E_P] + k_P[P][E^T] \\ &\quad - [E_P^T](k^{-T} + k_{-P} + (k^G + k_G)[G]),\end{aligned}\quad (25)$$

$$\begin{aligned}\frac{d[{}_G E^{G6}]}{dt} &= k^{-G}[{}^G E_G^{G6}] + k_{-T}[{}_G E_T^{G6}] + k_{-P}[{}_G E_P^{G6}] + k_G[G][E^{G6}] + k^{G6}[G6][{}_G E] \\ &\quad - [{}_G E^{G6}](k_{-G} + k^{-G6} + k^G[G]),\end{aligned}\quad (26)$$

$$\begin{aligned}\frac{d[E_T^{G6}]}{dt} &= k^{-G}[{}^G E_T^{G6}] + k_{-G}[{}_G E_T^{G6}] + k^{G6}[G6][E_T] \\ &\quad - [E_T^{G6}](k_{-T} + k^{-G6} + (k^G + k_G)[G]),\end{aligned}\quad (27)$$

$$\begin{aligned}\frac{d[E_P^{G6}]}{dt} &= k^{-G}[{}^G E_P^{G6}] + k_{-G}[{}_G E_P^{G6}] + k^{G6}[G6][E_P] \\ &\quad - [E_P^{G6}](k^{-G6} + k_{-P} + (k^G + k_G)[G]),\end{aligned}\quad (28)$$

$$\begin{aligned}\frac{d[{}_G E^P]}{dt} &= k^{-G}[{}^G E^P] + k_{-T}[{}_G E_T^P] + k_{-G6}^P[{}_G E_{G6}^P] + k_{-P}[{}_G E_P^P] + k_G[G][E^P] + k^P[P][{}_G E] \\ &\quad - [{}_G E^P](k_{-G} + k^{-P} + k^G[G] + k_T[T] + k_{G6}^P[G6] + k_P[P]),\end{aligned}\quad (29)$$

$$\begin{aligned}\frac{d[E_T^P]}{dt} &= k^{-G}[{}^G E_T^P] + k_{-G}[{}_G E_T^P] + k_T[T][E^P] + k^P[P][E_T] \\ &\quad - [E_T^P](k_{-T} + k^{-P} + (k^G + k_G)[G]),\end{aligned}\quad (30)$$

$$\begin{aligned}\frac{d[E_{G6}^P]}{dt} &= k^{-G}[{}^G E_{G6}^P] + k_{-G}[{}_G E_{G6}^P] + k_{G6}^P[G6][E^P] + k^P[P][E_{G6}] \\ &\quad - [E_{G6}^P](k_{-G6}^P + k^{-P} + (k^G + k_G)[G]),\end{aligned}\quad (31)$$

$$\begin{aligned}\frac{d[E_P^P]}{dt} &= k^{-G}[{}^G E_P^P] + k_{-G}[{}_G E_P^P] + (k^P[E_P] + k_P[E^P])[P] \\ &\quad - [E_P^P](k^{-P} + k_{-P} + (k^G + k_G)[G]),\end{aligned}\quad (32)$$

$$\begin{aligned}\frac{d[{}_G E_T]}{dt} &= k^{-G}[{}_G^G E_T] + k^{-T}[{}_G E_T^T] + k^{-G6}[{}_G E_T^{G6}] + k^{-P}[{}_G E_T^P] + k_G[G][E_T] + k_T[T][{}_G E] \\ &\quad - [{}_G E_T](k_0 + k_{-G} + k_{-T} + k^G[G] + k^T[T] + k^{G6}[G6] + k^P[P]),\end{aligned}\quad (33)$$

$$\begin{aligned}\frac{d[{}_G E_{G6}]}{dt} &= k^{-G}[{}_G^G E_{G6}] + k^{-T}[{}_G E_{G6}^T] + k^{-P}[{}_G E_{G6}^P] + k_G[G][E_{G6}] + k_{G6}[G6][{}_G E] \\ &\quad - [{}_G E_{G6}](k_{-G} + k_{-G6} + k^G[G] + k^T[T] + k^P[P]),\end{aligned}\quad (34)$$

$$\begin{aligned}\frac{d[{}_G E_P]}{dt} &= k^{-G}[{}_G^G E_P] + k^{-T}[{}_G E_P^T] + k^{-G6}[{}_G E_P^{G6}] + k^{-P}[{}_G E_P^P] + k_G[G][E_P] + k_P[P][{}_G E] \\ &\quad - [{}_G E_P](k_{-G} + k_{-P} + k^G[G] + k^T[T] + k^{G6}[G6] + k^P[P]),\end{aligned}\quad (35)$$

$$\begin{aligned}\frac{d[{}_G^G E^T]}{dt} &= k_{-T}[{}_G^G E_T^T] + k_{-G6}[{}_G^G E_{G6}^T] + k_{-P}[{}_G^G E_P^T] + (k^G[{}_G E^T] + k_G[{}_G E^T])[G] + k^T[T][{}_G^G E] \\ &\quad - [{}_G^G E^T](k^{-G} + k_{-G} + k^{-T} + k_T[T] + k_{G6}[G6] + k_P[P]),\end{aligned}\quad (36)$$

$$\begin{aligned}\frac{d[{}_G E_T^T]}{dt} &= k_{-G}[{}_G^G E_T^T] + k^G[G][E_T^T] + (k^T[{}_G E_T] + k_T[{}_G E^T])[T] \\ &\quad - [{}_G E_T^T](k^{-G} + k^{-T} + k_{-T} + k_G[G]),\end{aligned}\quad (37)$$

$$\begin{aligned}\frac{d[{}_G E_{G6}^T]}{dt} &= k_{-G}[{}_G^G E_{G6}^T] + k^G[G][E_{G6}^T] + k^T[T][{}_G E_{G6}] + k_{G6}[G6][{}_G E^T] \\ &\quad - [{}_G E_{G6}^T](k^{-G} + k^{-T} + k_{-G6} + k_G[G]),\end{aligned}\quad (38)$$

$$\begin{aligned}\frac{d[{}_G E_P^T]}{dt} &= k_{-G}[{}_G^G E_P^T] + k^G[G][E_P^T] + k^T[T][{}_G E_P] + k_P[P][{}_G E^T] \\ &\quad - [{}_G E_P^T](k^{-G} + k^{-T} + k_{-P} + k_G[G]),\end{aligned}\quad (39)$$

$$\begin{aligned}\frac{d[{}_G^G E^{G6}]}{dt} &= k_{-T}[{}_G^G E_T^{G6}] + k_{-P}[{}_G^G E_P^{G6}] + (k^G[{}_G E^{G6}] + k_G[{}_G E^{G6}])[G] + k^{G6}[{}_G^G E][G6] \\ &\quad - [{}_G^G E^{G6}](k^{-G} + k_{-G} + k^{-G6}),\end{aligned}\quad (40)$$

$$\begin{aligned}\frac{d[{}_G E_T^{G6}]}{dt} &= k_{-G}[{}_G^G E_T^{G6}] + k^G[G][E_T^{G6}] + k^{G6}[G6][{}_G E_T] \\ &\quad - [{}_G E_T^{G6}](k^{-G} + k_{-T} + k^{-G6} + k_G[G]),\end{aligned}\quad (41)$$

$$\begin{aligned}\frac{d[{}_G E_P^{G6}]}{dt} &= k_{-G}[{}_G^G E_P^{G6}] + k^G[G][E_P^{G6}] + k^{G6}[G6][{}_G E_P] \\ &\quad - [{}_G E_P^{G6}](k^{-G} + k^{-G6} + k_{-P} + k_G[G]),\end{aligned}\quad (42)$$

$$\begin{aligned}\frac{d[{}_G^G E^P]}{dt} &= k_{-T}[{}_G^G E_T^P] + k_{-G6}^P[{}_G^G E_{G6}^P] + k_{-P}[{}_G^G E_P^P] + (k^G[{}_G E^P] + k_G[{}_G E^P])[G] + k^P[P][{}_G^G E] \\ &\quad - [{}_G^G E^P](k^{-G} + k_{-G} + k^{-P} + k_T[T] + k_{G6}^P[G6] + k_P[P]),\end{aligned}\quad (43)$$

$$\begin{aligned}\frac{d[{}_G E_T^P]}{dt} &= k_{-G}[{}_G^G E_T^P] + k^G[G][E_T^P] + k_T[T][{}_G E^P] + k^P[P][{}_G E_T] \\ &\quad - [{}_G E_T^P](k^{-G} + k_{-T} + k^{-P} + k_G[G]),\end{aligned}\quad (44)$$

$$\begin{aligned}\frac{d[{}_G E_{G6}^P]}{dt} &= k_{-G}[{}_G^G E_{G6}^P] + k^G[G][E_{G6}^P] + k_{G6}^P[G6][{}_G E^P] + k^P[P][{}_G E_{G6}] \\ &\quad - [{}_G E_{G6}^P](k^{-G} + k_{-G6}^P + k^{-P} + k_G[G]),\end{aligned}\quad (45)$$

$$\begin{aligned}\frac{d[G E_P^P]}{dt} &= k_{-G}[G E_P^P] + k^G[G][E_P^P] + (k^P[G E_P] + k_P[G E^P])[P] \\ &\quad - [G E_P^P](k^{-G} + k^{-P} + k_{-P} + k_G[G]),\end{aligned}\quad (46)$$

$$\begin{aligned}\frac{d[G E_T]}{dt} &= k^{-T}[G E_T^T] + k^{-G6}[G E_T^{G6}] + k^{-P}[G E_T^P] + (k^G[G E_T] + k_G[G E_T])[G] + k_T[T][G E] \\ &\quad - [G E_T](k_0 + k^{-G} + k_{-G} + k_{-T} + k^T[T] + k^{G6}[G6] + k^P[P]),\end{aligned}\quad (47)$$

$$\begin{aligned}\frac{d[G E_T^T]}{dt} &= k^{-G}[G E_T^T] + k_G[G][E_T^T] + (k^T[G E_T] + k_T[G E^T])[T] \\ &\quad - [G E_T^T](k_0 + k_{-G} + k^{-T} + k_{-T} + k^G[G]),\end{aligned}\quad (48)$$

$$\begin{aligned}\frac{d[G E_T^{G6}]}{dt} &= k^{-G}[G E_T^{G6}] + k_G[G][E_T^{G6}] + k^{G6}[G6][G E_T] \\ &\quad - [G E_T^{G6}](k_0 + k_{-G} + k_{-T} + k^{-G6} + k^G[G]),\end{aligned}\quad (49)$$

$$\begin{aligned}\frac{d[G E_T^P]}{dt} &= k^{-G}[G E_T^P] + k_G[G][E_T^P] + k_T[T][-G E^P] + k^P[P][G E_T] \\ &\quad - [G E_T^P](k_0 + k_{-G} + k_{-T} + k^{-P} + k^G[G]),\end{aligned}\quad (50)$$

$$\begin{aligned}\frac{d[G E_{G6}]}{dt} &= k^{-T}[G E_{G6}^T] + k^{-P}[G E_{G6}^P] + (k^G[G E_{G6}] + k_G[G E_{G6}])[G] + k_{G6}[G6][G E] \\ &\quad - [G E_{G6}](k^{-G} + k_{-G} + k_{-G6} + k^T[T] + k^P[P]),\end{aligned}\quad (51)$$

$$\begin{aligned}\frac{d[G E_{G6}^T]}{dt} &= k^{-G}[G E_{G6}^T] + k_G[G][E_{G6}^T] + k^T[T][G E_{G6}] + k_{G6}[G6][G E^T] \\ &\quad - [G E_{G6}^T](k_{-G} + k^{-T} + k_{-G6} + k^G[G]),\end{aligned}\quad (52)$$

$$\begin{aligned}\frac{d[G E_{G6}^P]}{dt} &= k^{-G}[G E_{G6}^P] + k_G[G][E_{G6}^P] + k_{G6}^P[G6][G E^P] + k^P[P][G E_{G6}] \\ &\quad - [G E_{G6}^P](k_{-G} + k_{-G6}^P + k^{-P} + k^G[G]),\end{aligned}\quad (53)$$

$$\begin{aligned}\frac{d[G E_P]}{dt} &= k^{-T}[G E_P^T] + k^{-G6}[G E_P^{G6}] + k^{-P}[G E_P^P] + (k^G[G E_P] + k_G[G E_P])[G] + k_P[P][G E] \\ &\quad - [G E_P](k^{-G} + k_{-G} + k_{-P} + k^T[T] + k^{G6}[G6] + k^P[P]),\end{aligned}\quad (54)$$

$$\begin{aligned}\frac{d[G E_P^T]}{dt} &= k^{-G}[G E_P^T] + k_G[G][E_P^T] + k^T[T][G E_P] + k_P[P][G E^T] \\ &\quad - [G E_P^T](k_{-G} + k^{-T} + k_{-P} + k^G[G]),\end{aligned}\quad (55)$$

$$\begin{aligned}\frac{d[G E_P^{G6}]}{dt} &= k^{-G}[G E_P^{G6}] + k_G[G][E_P^{G6}] + k^{G6}[G6][G E_P] \\ &\quad - [G E_P^{G6}](k_{-G} + k^{-G6} + k_{-P} + k^G[G]),\end{aligned}\quad (56)$$

$$\begin{aligned}\frac{d[G E_P^P]}{dt} &= k^{-G}[G E_P^P] + k_G[G][E_P^P] + (k^P[G E_P] + k_P[-G E^P])[P] \\ &\quad - [G E_P^P](k_{-G} + k^{-P} + k_{-P} + k^G[G]),\end{aligned}\quad (57)$$

$$\begin{aligned}\frac{d[G E_T^T]}{dt} &= (k^G[G E_T^T] + k_G[G E_T^T])[G] + (k^T[G E_T] + k_T[G E^T])[T] \\ &\quad - [G E_T^T](k_0 + k^{-G} + k_{-G} + k^{-T} + k_{-T}),\end{aligned}\quad (58)$$



$$\begin{aligned}\frac{d[{}^G E_{G6}^T]}{dt} &= (k^G[{}_G E_{G6}^T] + k_G[{}^G E_{G6}^T])[G] + k^T[T][{}_G E_{G6}] + k_{G6}[G6][{}_G E^T] \\ &\quad - [{}_G E_{G6}^T](k^{-G} + k_{-G} + k^{-T} + k_{-G6}),\end{aligned}\tag{59}$$

$$\begin{aligned}\frac{d[{}^G E_P^T]}{dt} &= (k^G[{}_G E_P^T] + k_G[{}^G E_P^T])[G] + k^T[T][{}_G E_P] + k_P[P][{}_G E^T] \\ &\quad - [{}_G E_P^T](k^{-G} + k_{-G} + k^{-T} + k_{-P}),\end{aligned}\tag{60}$$

$$\begin{aligned}\frac{d[{}^G E_T^{G6}]}{dt} &= (k^G[{}_G E_T^{G6}] + k_G[{}^G E_T^{G6}])[G] + k^{G6}[G6][{}_G E_T] \\ &\quad - [{}_G E_T^{G6}](k_0 + k^{-G} + k_{-G} + k_{-T} + k^{-G6}),\end{aligned}\tag{61}$$

$$\begin{aligned}\frac{d[{}^G E_P^{G6}]}{dt} &= (k^G[{}_P E_P^{G6}] + k_G[{}^G E_P^{G6}])[G] + k^{G6}[G6][{}_G E_P] \\ &\quad - [{}_G E_P^{G6}](k^{-G} + k_{-G} + k^{-G6} + k_{-P}),\end{aligned}\tag{62}$$

$$\begin{aligned}\frac{d[{}_G E_T^P]}{dt} &= (k^G[{}_G E_T^P] + k_G[{}^G E_T^P])[G] + k_T[T][{}_G E^P] + k^P[P][{}_G E_T] \\ &\quad - [{}_G E_T^P](k_0 + k^{-G} + k_{-G} + k_{-T} + k^{-P}),\end{aligned}\tag{63}$$

$$\begin{aligned}\frac{d[{}_G E_{G6}^P]}{dt} &= (k^G[{}_G E_{G6}^P] + k_G[{}^G E_{G6}^P])[G] + k_{G6}^P[G6][{}_G E^P] + k^P[P][{}_G E_{G6}] \\ &\quad - [{}_G E_{G6}^P](k^{-G} + k_{-G} + k_{-G6}^P + k^{-P}),\end{aligned}\tag{64}$$

$$\begin{aligned}\frac{d[{}_G E_P^P]}{dt} &= (k^G[{}_G E_P^P] + k_G[{}^G E_P^P])[G] + (k^P[{}_G E_P] + k_P[{}^G E^P])[P] \\ &\quad - [{}_G E_P^P](k^{-G} + k_{-G} + k^{-P} + k_{-P}).\end{aligned}\tag{65}$$

These equations are solved subject to the initial conditions

$$\begin{aligned}[E](t=0) &= E_0, \\ [G](t=0) &= G_0, \\ [T](t=0) &= ATP_0, \\ [G6](t=0) &= 0, \\ [P](t=0) &= P_{i0}, \\ [D](t=0) &= 0, \\ [{}^G E](t=0) &= 0, \\ [{}_G E](t=0) &= 0, \\ [E^k](t=0) &= 0, & k = T, G6, P, \\ [E_k](t=0) &= 0, & k = T, G6, P, \\ [{}^G E^j](t=0) &= 0, & j = T, G6, P, \\ [{}_G E_j](t=0) &= 0, & j = T, G6, P, \\ [{}_G E](t=0) &= 0, \\ [{}^G E_j](t=0) &= 0, & J = T, G6, P, \\ [{}_G E^J](t=0) &= 0, & J = T, G6, P,\end{aligned}$$

$$\begin{array}{lll}
[E_j^k](t=0) = 0, & k = T, G6, P, & j = T, P, \\
[E_{G6}^j](t=0) = 0, & j = T, P, & \\
[G E_y^x](t=0) = 0, & x = T, G6, P, & y = G, T, P, \\
[_G E_y^x](t=0) = 0, & x = G, T, P, & y = T, G6, P, \\
[_G E_{G6}^x](t=0) = 0, & x = T, P, & \\
[_G E_x^{G6}](t=0) = 0, & x = T, P, & \\
[_G E_y^x](t=0) = 0, & x = T, P, & y = T, P, \\
[_G E_x^{G6}](t=0) = 0, & x = T, P, & \\
[_G E_{G6}^x](t=0) = 0, & x = T, P, & 
\end{array}$$

where  $E_0$ ,  $G_0$ ,  $ATP_0$ ,  $P_{i0}$  give the initial concentrations of enzyme, glucose,  $ATP$ , and  $P_i$ , respectively.

### 3. Calculations of parameters

In this section, the  $\Lambda$  and  $\Omega$  methods discussed in [1] are used to calculate values of the model parameters.

Let  $\Omega = T$  and  $\Lambda = 100$ . The Michaelis-Menten constant for the  $C$  binding site for glucose is

$$K_m = 53 \mu M,$$

and the catalytic constant  $k_0 = 63 s^{-1}$ . Using the formula for  $\Lambda$  method, we have

$$k_G = (\Lambda k_G)/K_m = 118868 mM^{-1} s^{-1}, \text{ and } k_{-G} = (\Lambda - T)k_G = 6237 s^{-1}.$$

We set  $k^G = k_G$  and  $k^{-G} = k_{-G}$  since there are no dissociation constant for the  $N$  binding site for glucose available in the literature. Similarly, the  $\Lambda$  method can be used for calculating  $k_T, k_{-T}$ , then set  $k^T = k_T, k^{-T} = k_{-T}$  as well. As a result,  $k^T = k_T = 9000 mM^{-1} s^{-1}$ , and  $k^{-T} = k_{-T} = 6237 s^{-1}$ .

The  $\Omega$  method was used to calculate the kinetic constants for  $P_i$  and  $G6P$ . For example, the dissociation constant for the  $N$  binding site for  $P_i$  is  $K_D = 0.022 mM$ . Using the formula for the  $\Omega$  method [1], we have

$$k^P = \Omega k^T = 9000 mM^{-1} s^{-1}, \text{ and } k^{-G6} = 198 s^{-1}.$$

Analogously, we can calculate the values of  $k^{G6}$ ,  $k^{-G6}$ ,  $k_{G6}$ ,  $k_{-G6}$ ,  $k_P$ ,  $k_{-P}$ ,  $k_{G6}^P$ , and  $k_{-G6}^P$ .

### References

- [1] Chin-Rang Yang, Bruce E Shapiro, Eric D Mjolsness, and G Wesley Hatfield. An enzyme mechanism language for the mathematical modeling of metabolic pathways. *Bioinformatics*, 21(6):774-780, 2004.

### 4. Software

The software used for the calculations of the paper can be found at the following link

<https://github.com/vinh-mai/Hexokinase-2019>
